# Supplementary material for: Molecular engineering of ruthenium(ii) complexes with (3-polyamino)phenanthroline ligands for developing reusable optical sensors for Cu(ii) ions
Source: Royal Society of Chemistry journal article supplement (doi:10.1039/d2tc03764e), 2022-01-01
Supplement: d2tc03764e1.pdf [file d2tc03764e1.pdf]

# Molecular Engineering of Ruthenium(II) Complexes with(3-Polyamino)phenanthroline Ligands for Developing Reusable Optical Sensors for Cu(II) ions

Anton S. Abel,<sup>[a,b]\*</sup> Andrey V. Cheprakov,<sup>[a]</sup> Alexei D. Averin,<sup>[a,c]</sup> Irina P. Beletskaya,<sup>[a,c]</sup>  
Michel Meyer,<sup>[b]</sup> Stéphane Brandès,<sup>[b]</sup> Myriam Laly,<sup>[b]</sup> Alla Bessmertnykh-Lemeune,<sup>[b,d]\*</sup> and  
Séverinne Rigolet<sup>[e]</sup>

[a] Lomonosov Moscow State University, Department of Chemistry, 1-3, Leninskie Gory, Moscow, 119991, Russia. E-mail: antonabel@list.ru

[b] Institut de Chimie Moléculaire de l'Université de Bourgogne (ICMUB), UMR 6302, CNRS, Université Bourgogne-Franche-Comté, 9 avenue Alain Savary, BP 47870, 21078 Dijon Cedex, France

[c] Frumkin Institute of Physical Chemistry and Electrochemistry, Russian Academy of Sciences, Leninsky Pr. 31, Moscow, 119071, Russia

[d] ENS de Lyon, UMR 5182, CNRS, Université Claude Bernard Lyon 1, Laboratoire de Chimie, 69342 Lyon, France. E-mail: alla.lemeune@ens-lyon.fr

[e] Institut de Science des Matériaux de Mulhouse, UMR 7361, CNRS, Université de Haute-Alsace, 15 rue Jean Starcky, 68057 Mulhouse Cedex, France

## Supporting information

### Table of contents

|                                                                                                                                                      |     |
|------------------------------------------------------------------------------------------------------------------------------------------------------|-----|
| 1. Protonation studies of complex <b>Ru(N<sub>3</sub>P<sub>3</sub>phen)</b> .....                                                                    | S2  |
| 2. Sensing properties of complex <b>Ru(N<sub>3</sub>P<sub>3</sub>phen)</b> .....                                                                     | S5  |
| 3. Structural studies of the copper(II) complex with <b>Ru(N<sub>2</sub>P<sub>2</sub>phen)</b> and <b>Ru(N<sub>3</sub>P<sub>3</sub>phen)</b> .....   | S9  |
| 4. DFT studies of the zinc complex with <b>Ru(N<sub>3</sub>P<sub>3</sub>phen)</b> .....                                                              | S11 |
| 5. Characterization of <b>Ru(N<sub>2</sub>P<sub>2</sub>phen)@TiO<sub>2</sub></b> and <b>Ru(N<sub>3</sub>P<sub>3</sub>phen)@TiO<sub>2</sub></b> ..... | S15 |
| 6. Studies of sensing properties of <b>Ru(N<sub>2</sub>P<sub>2</sub>phen)@TiO<sub>2</sub></b> .....                                                  | S18 |
| 7. Sorption studies of Cu <sup>2+</sup> ions by TiO <sub>2</sub> and <b>Ru(N<sub>3</sub>P<sub>3</sub>phen)@TiO<sub>2</sub></b> .....                 | S19 |
| 8. NMR spectra.....                                                                                                                                  | S20 |
| 9. References.....                                                                                                                                   | S23 |

# 1. Protonation studies of complex $\text{Ru}(\text{N}_3\text{P}_3\text{phen})$

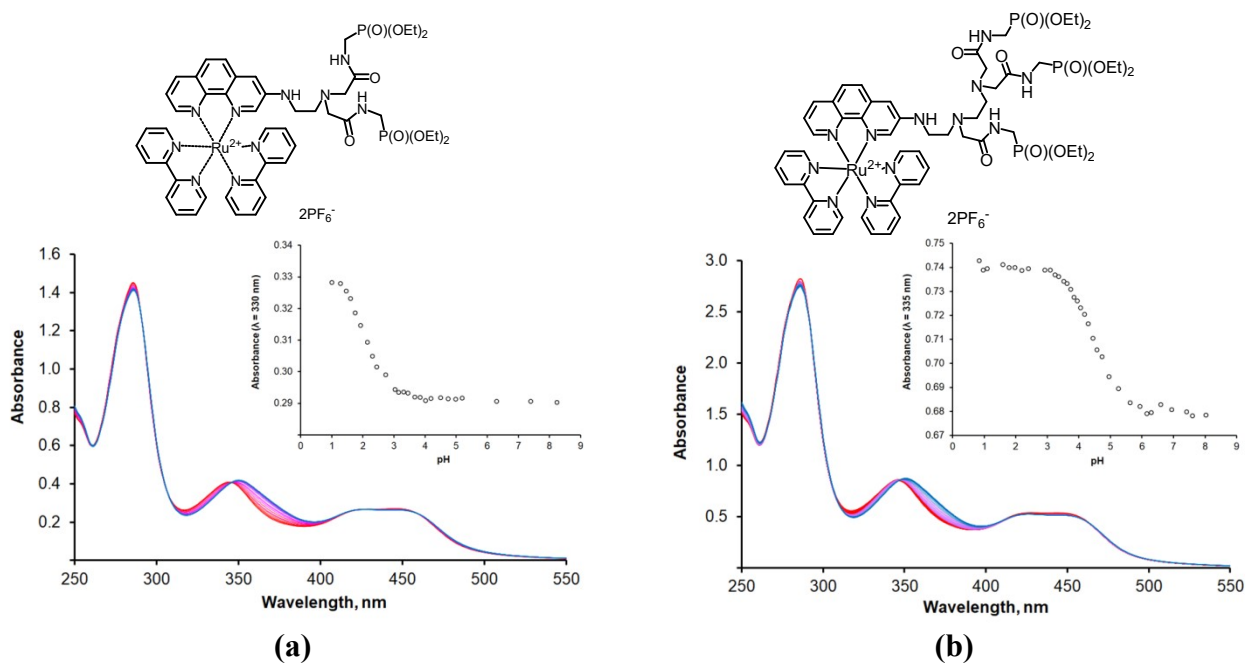

**Figure S1.** Comparison of the evolution of the electronic absorption spectra of the compounds  $\text{Ru}(\text{N}_2\text{P}_2\text{phen})$  (a) and  $\text{Ru}(\text{N}_3\text{P}_3\text{phen})$  (b) in water as a function of pH. Insets show the pH dependence of the absorbance at  $\lambda_{\text{abs}} = 335 \text{ nm}$ .

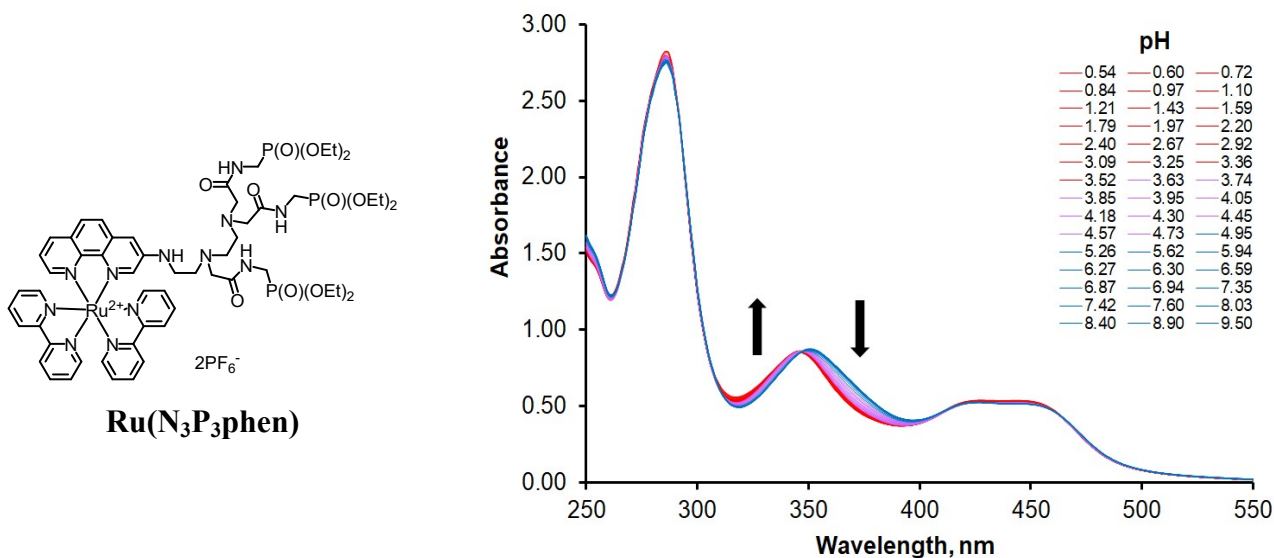

**Figure S2.** Spectrophotometric titration of  $\text{Ru}(\text{N}_3\text{P}_3\text{phen})$  in water.  $[\text{Ru}(\text{N}_3\text{P}_3\text{phen})] = 51 \mu\text{M}$ ,  $I = 0.1 \text{ M KCl}$ ,  $\text{pH} = 1.0\text{--}9.50$ .

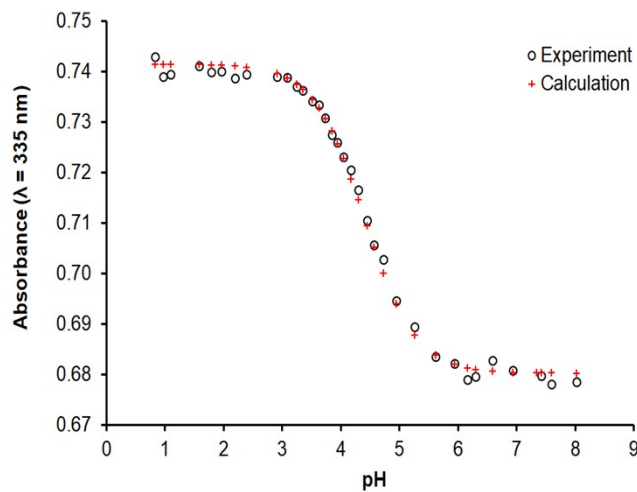

**Figure S3.** Absorbance changes with pH at  $\lambda = 335$  nm for **Ru(N<sub>3</sub>P<sub>3</sub>phen)** in water as a function of pH.

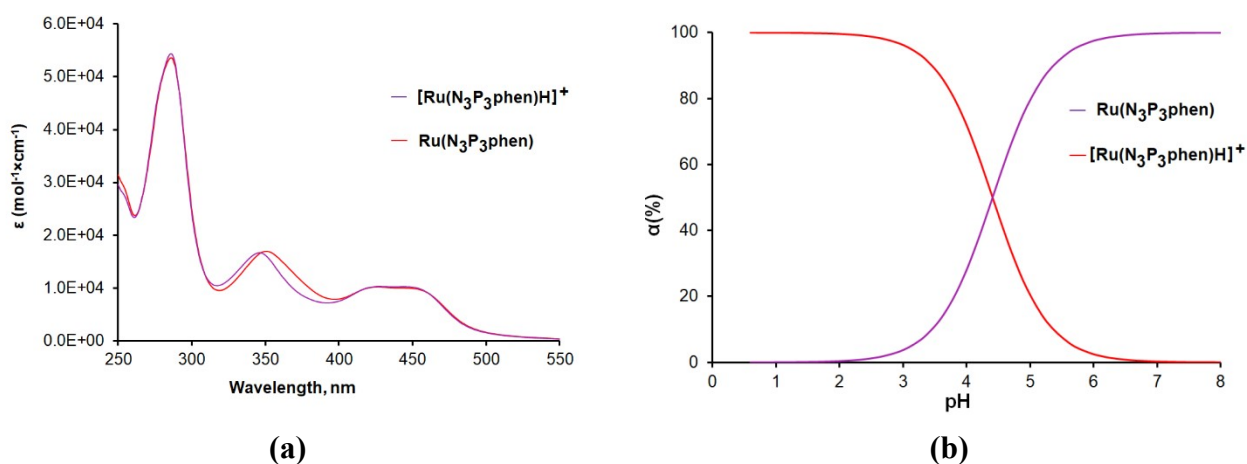

**Figure S4.** (a) UV-vis absorption spectra of **Ru(N<sub>3</sub>P<sub>3</sub>phen)** and **[Ru(N<sub>3</sub>P<sub>3</sub>phen)H]<sup>+</sup>** in water calculated using HypSpec program.<sup>[1]</sup> (b) Species distribution diagram for the **Ru(N<sub>3</sub>P<sub>3</sub>phen)/H<sup>+</sup>** system in water calculated using HypSpec program.<sup>[1]</sup>

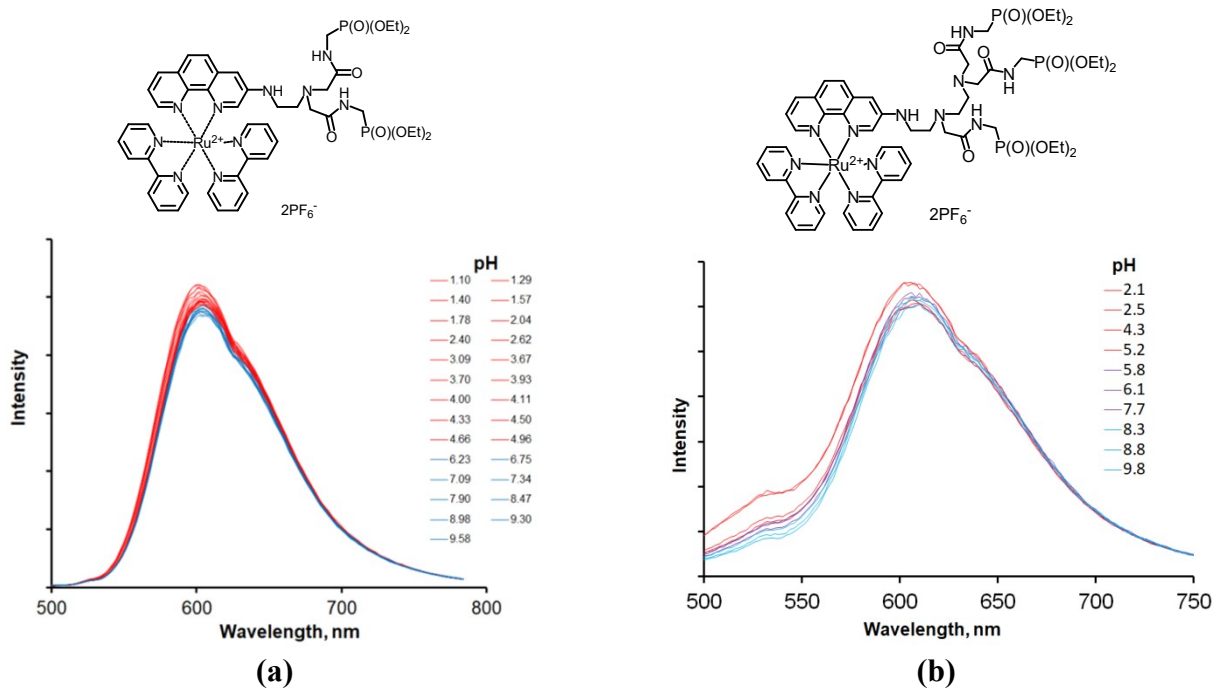

**Figure S5.** (a) Fluorimetric titration of **Ru(N<sub>2</sub>P<sub>2</sub>phen)** in water. [**Ru(N<sub>2</sub>P<sub>2</sub>phen)**] = 6.6 μM, *I* = 0.1 M KCl, λ<sub>ex</sub> = 450 nm, pH = 1.1–9.6. (b) Fluorimetric titration of **Ru(N<sub>3</sub>P<sub>3</sub>phen)** in water. [**Ru(N<sub>3</sub>P<sub>3</sub>phen)**] = 4.7 μM, *I* = 0.1 M KCl, λ<sub>ex</sub> = 450 nm, pH = 2.1–9.8.

## 2. Sensing properties of complex Ru(N<sub>3</sub>P<sub>3</sub>phen)

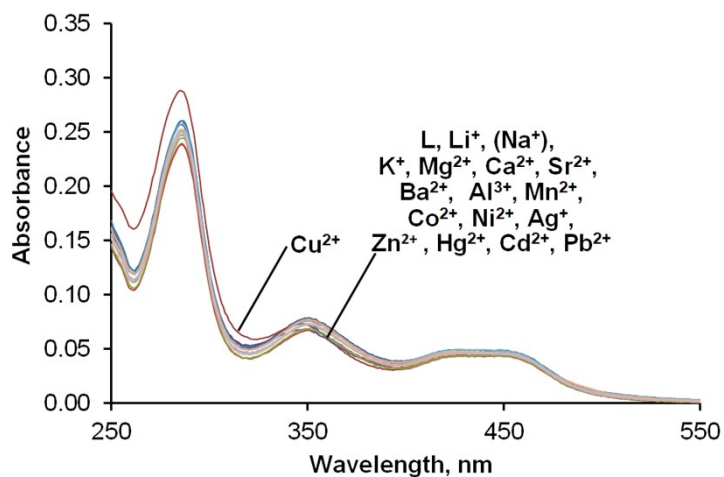

**Figure S6.** UV-vis absorption spectra of Ru(N<sub>3</sub>P<sub>3</sub>phen) ([Ru(N<sub>3</sub>P<sub>3</sub>phen)] = 4.7 μM, 0.03M HEPES buffer, pH = 7.4) before and after addition of 2 equiv. of metal perchlorates. The spectrum in the presence of sodium perchlorate was recorded without HEPES buffer in deionized water at pH = 5.42.

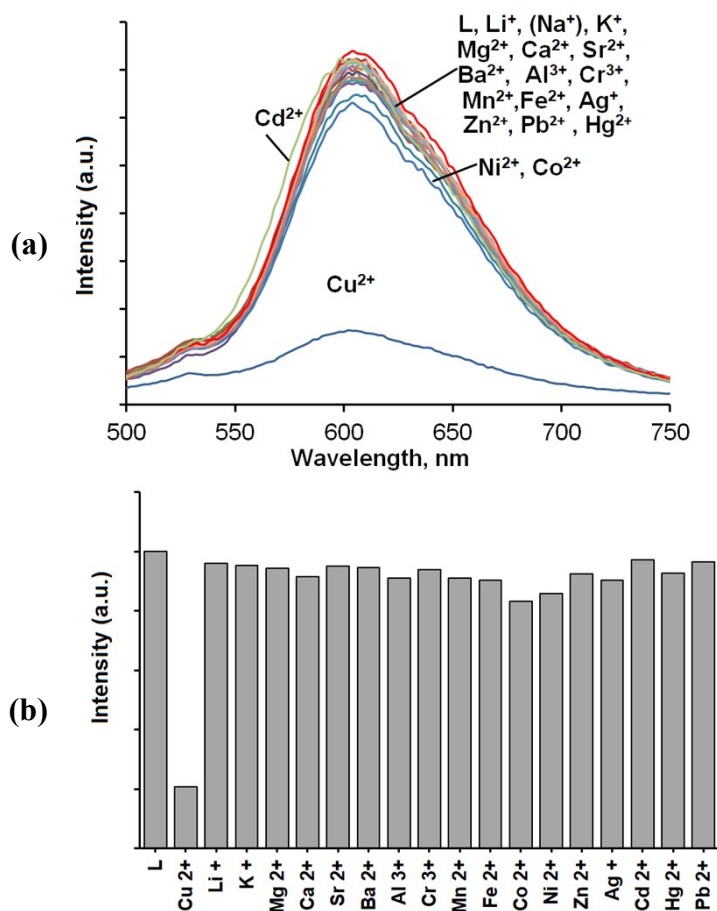

**Figure S7.** (a) Fluorescence spectra of **Ru(N<sub>3</sub>P<sub>3</sub>phen)** ( $[\text{Ru}(\text{N}_3\text{P}_3\text{phen})] = 4.7 \mu\text{M}$ , 0.03M HEPES buffer, pH = 7.4,  $\lambda_{ex} = 450$  nm) before and after addition of 2 equiv. of metal perchlorates. (b) Normalized fluorescence intensity of the studied solutions at  $\lambda_{em} = 600$  nm. The spectrum in the presence of sodium perchlorate was recorded without HEPES buffer in deionized water at pH = 5.42.

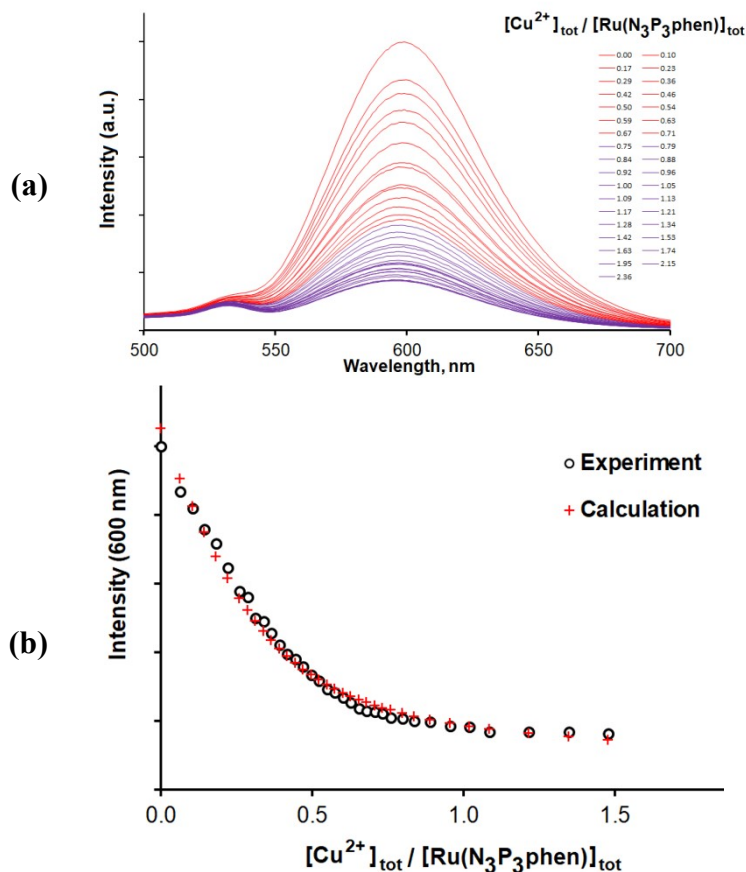

**Figure S8.** (a) Evolution of the emission spectrum of  $\text{Ru}(\text{N}_3\text{P}_3\text{phen})$  ( $[\text{Ru}(\text{N}_3\text{P}_3\text{phen})] = 5.1 \mu\text{M}$ ,  $0.03\text{M}$  HEPES buffer,  $\text{pH} = 7.4$ ,  $\lambda_{\text{ex}} = 450 \text{ nm}$ ) upon addition of  $\text{Cu}(\text{ClO}_4)_2$  (0–1.5 equiv.). (b) Changes of the emission intensity as a function of the  $[\text{Cu}^{2+}]_{\text{tot}}/[\text{Ru}(\text{N}_3\text{P}_3\text{phen})]_{\text{tot}}$  ratio at  $\lambda_{\text{em}} = 600 \text{ nm}$ .

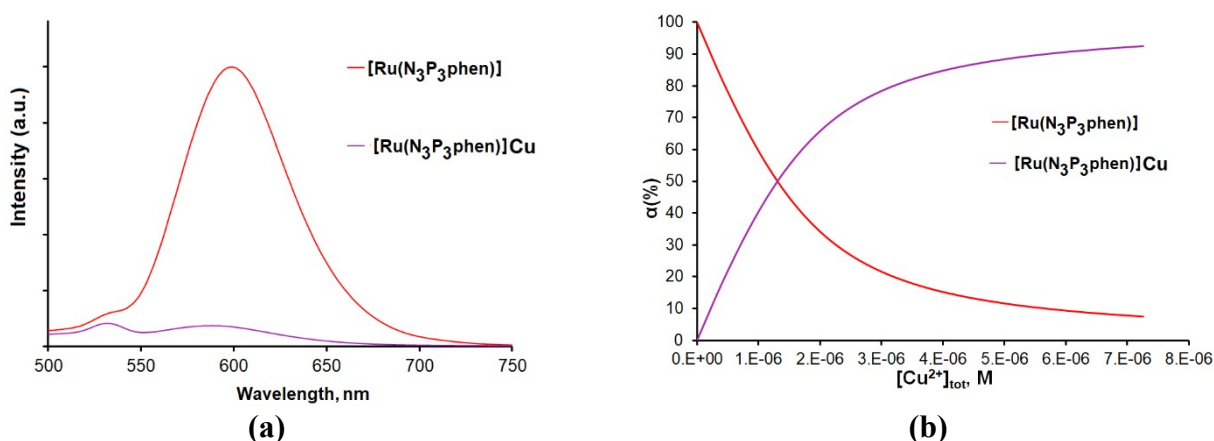

**Figure S9.** (a) Normalized fluorescence spectra of  $\text{Ru}(\text{N}_3\text{P}_3\text{phen})$  and  $[\text{Cu}(\text{Ru}(\text{N}_3\text{P}_3\text{phen}))]^{2+}$  in water calculated using HypSpec program.<sup>[1]</sup> (b) Species distribution diagram for the  $\text{Ru}(\text{N}_3\text{P}_3\text{phen})/\text{Cu}^{2+}$  system in water calculated using HypSpec program.<sup>[1]</sup> Data were fit with HypSpec using the following model:  $\text{Cu}^{2+} + \text{L} \rightleftharpoons [\text{CuL}]^{2+}$  ( $\log \beta_{110} = 6.05(5)$ ),  $\text{L} + \text{H}^+ \rightleftharpoons \text{LH}^+$  ( $\log \beta_{011} = 4.4$ ),  $\text{Cu}^{2+} + \text{H}_2\text{O} \rightleftharpoons [\text{Cu}(\text{OH})]^+ + \text{H}^+$  ( $\log \beta_{10-1} = -7.95$ ),<sup>[2]</sup>  $\text{Cu}^{2+} + 2\text{H}_2\text{O} \rightleftharpoons \text{Cu}(\text{OH})_2 + 2\text{H}^+$  ( $\log \beta_{10-2} = -16.2$ ),<sup>[2]</sup>  $2\text{Cu}^{2+} + 2\text{H}_2\text{O} \rightleftharpoons [\text{Cu}_2(\text{OH})_2]^{2+} + 2\text{H}^+$  ( $\log \beta_{20-2} = -10.43$ ).<sup>[2]</sup> Detection limit of  $\text{Cu}^{2+}$  ( $3\sigma$ ):  $0.02 \mu\text{M}$  (1.3 ppb).

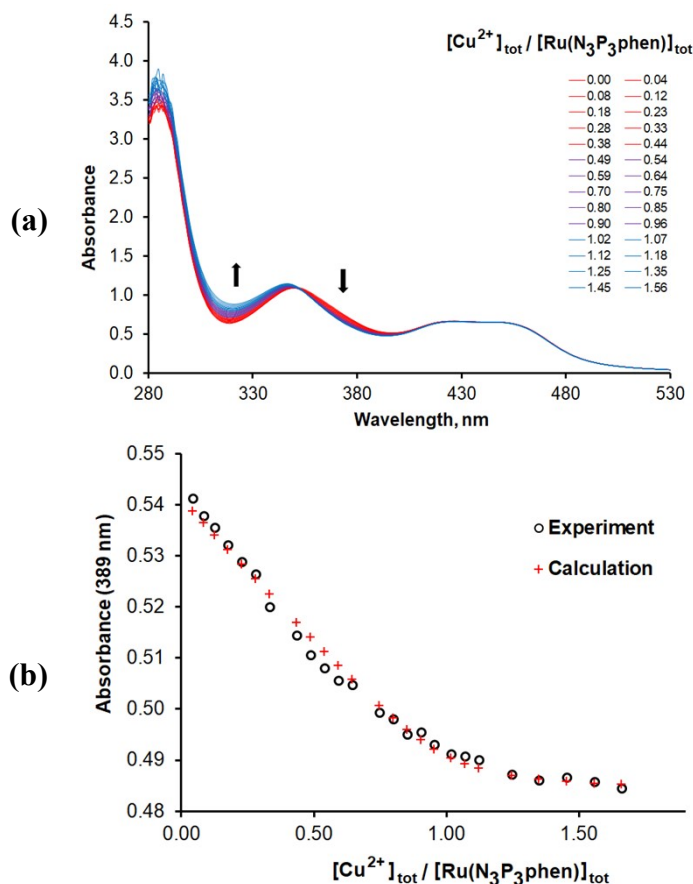

**Figure S10.** (a) Evolution of the UV-vis absorption spectrum of  $\text{Ru}(\text{N}_3\text{P}_3\text{phen})$  ( $[\text{Ru}(\text{N}_3\text{P}_3\text{phen})] = 64 \mu\text{M}$ ,  $0.03\text{M}$  HEPES buffer,  $\text{pH} = 7.4$ ) upon addition of  $\text{Cu}(\text{ClO}_4)_2$  (0–1.5 equiv.). (b) Changes of the absorbance as a function of the  $[\text{Cu}^{2+}]_{\text{tot}}/[\text{Ru}(\text{N}_3\text{P}_3\text{phen})]_{\text{tot}}$  ratio at  $\lambda = 389 \text{ nm}$ .

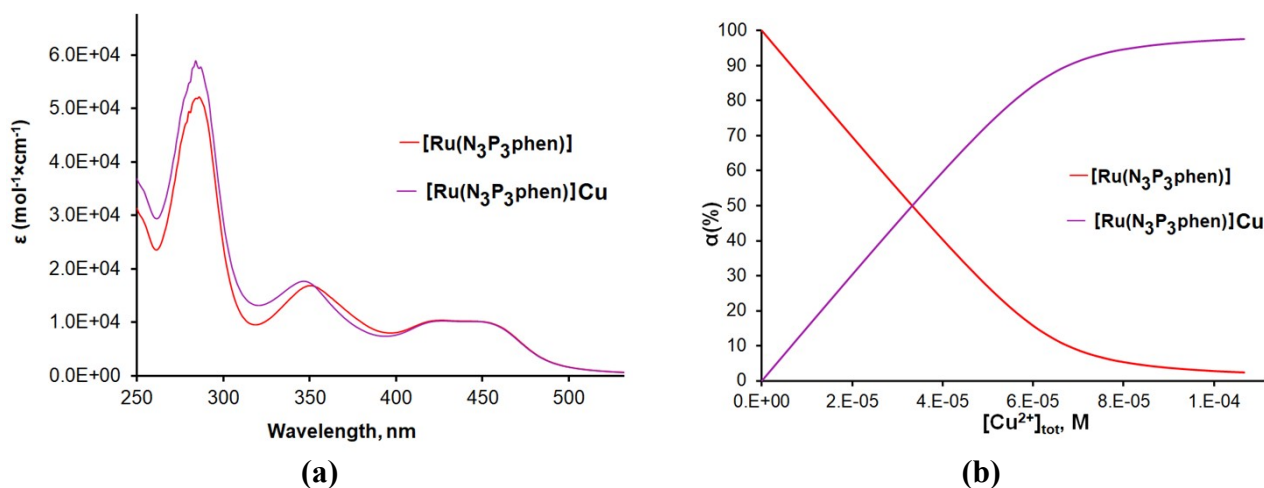

**Figure S11.** (a) UV-vis spectra of  $\text{Ru}(\text{N}_3\text{P}_3\text{phen})$  and  $[\text{Cu}(\text{Ru}(\text{N}_3\text{P}_3\text{phen}))]^{2+}$  in water calculated using HypSpec program.<sup>[1]</sup> (b) Species distribution diagram for the  $\text{Ru}(\text{N}_3\text{P}_3\text{phen})/\text{Cu}^{2+}$  system in water calculated using HypSpec program.<sup>[1]</sup> Data were fit with HypSpec using the following model:  $\text{Cu}^{2+} + \text{L} \rightleftharpoons [\text{CuL}]^{2+}$  ( $\log \beta_{110} = 5.97(2)$ ),  $\text{L} + \text{H}^+ \rightleftharpoons \text{LH}^+$  ( $\log \beta_{011} = 4.4$ ),  $\text{Cu}^{2+} + \text{H}_2\text{O} \rightleftharpoons [\text{Cu}(\text{OH})]^+ + \text{H}^+$  ( $\log \beta_{10-1} = -7.95$ ),<sup>[2]</sup>  $\text{Cu}^{2+} + 2\text{H}_2\text{O} \rightleftharpoons \text{Cu}(\text{OH})_2 + 2\text{H}^+$  ( $\log \beta_{10-2} = -16.2$ ),<sup>[2]</sup>  $2\text{Cu}^{2+} + 2\text{H}_2\text{O} \rightleftharpoons [\text{Cu}_2(\text{OH})_2]^{2+} + 2\text{H}^+$  ( $\log \beta_{20-2} = -10.43$ ).<sup>[2]</sup>



### 3. Structural studies of the copper(II) complex of Ru(N<sub>3</sub>P<sub>3</sub>phen)

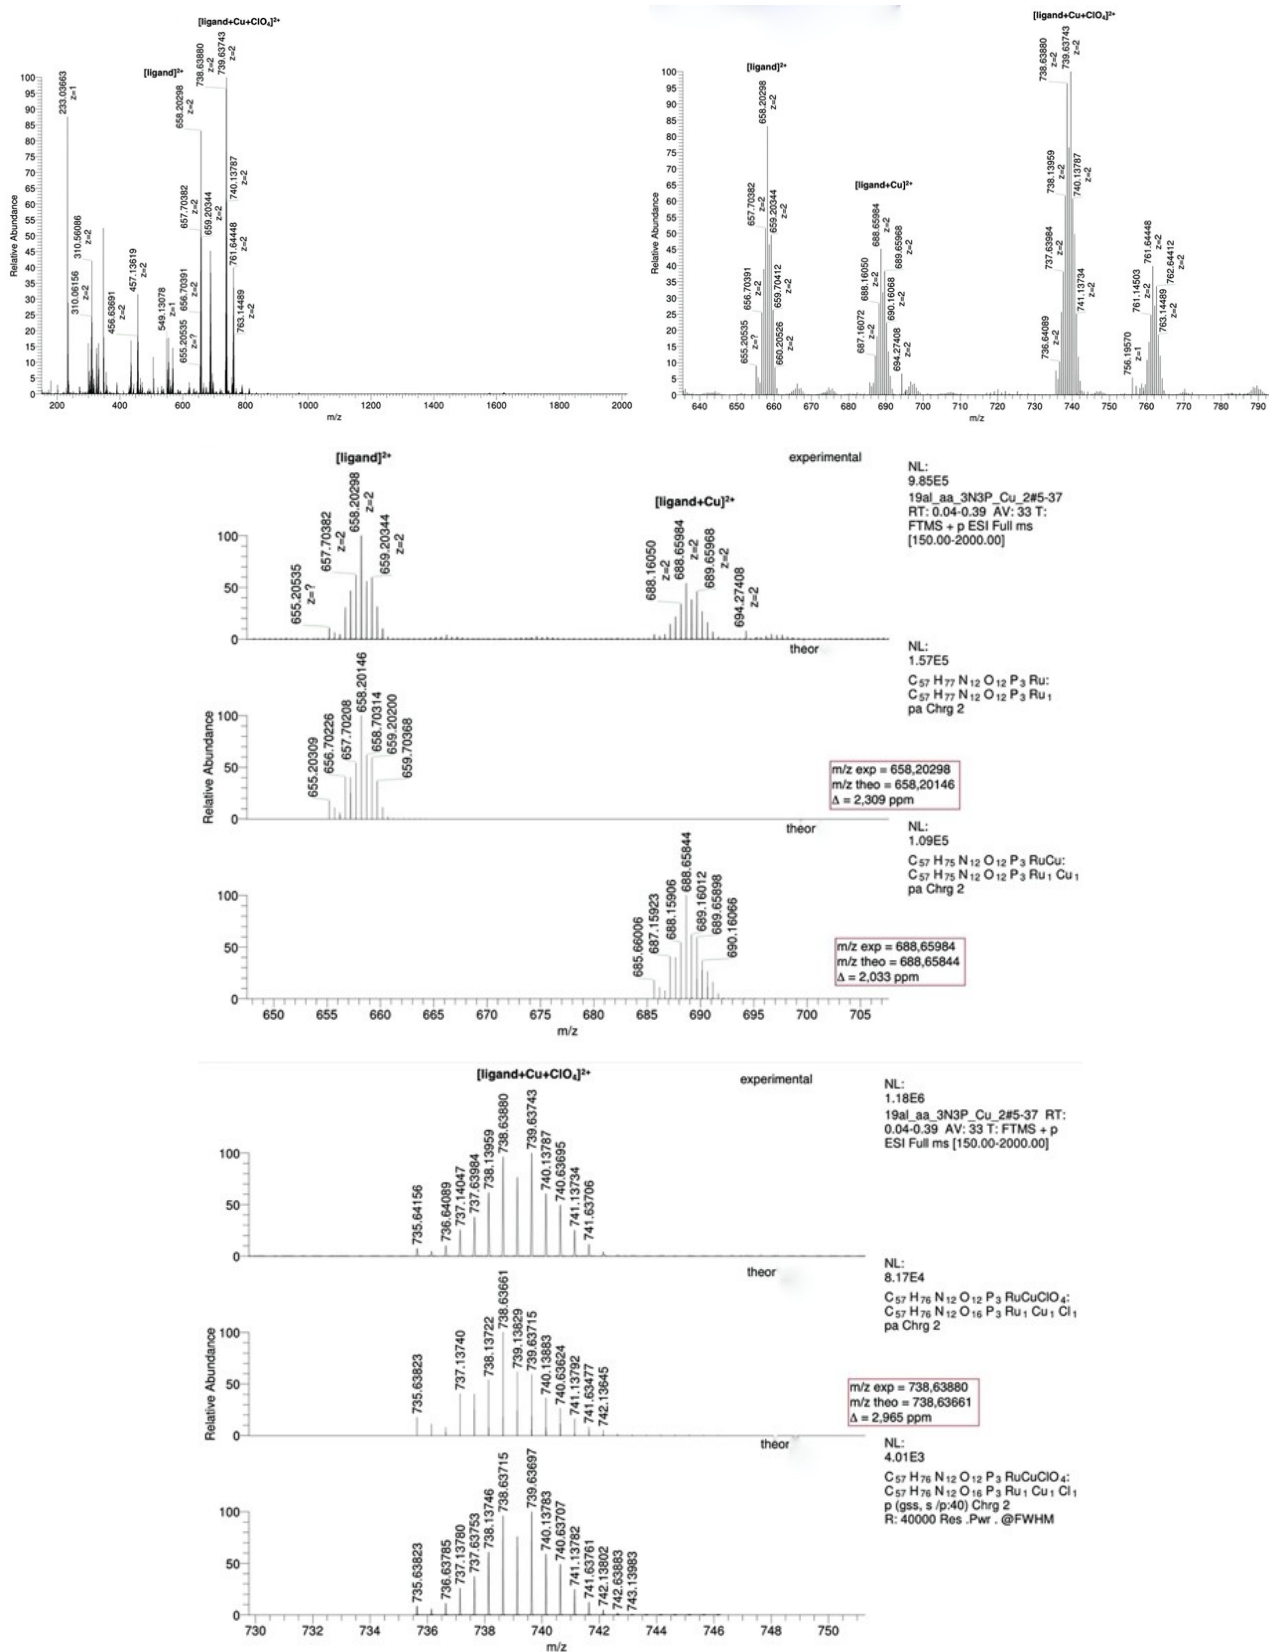

Figure S12. ESI-HRMS spectra of the {Cu[Ru(N<sub>3</sub>P<sub>3</sub>phen)]}(ClO<sub>4</sub>)<sub>2</sub> complex.

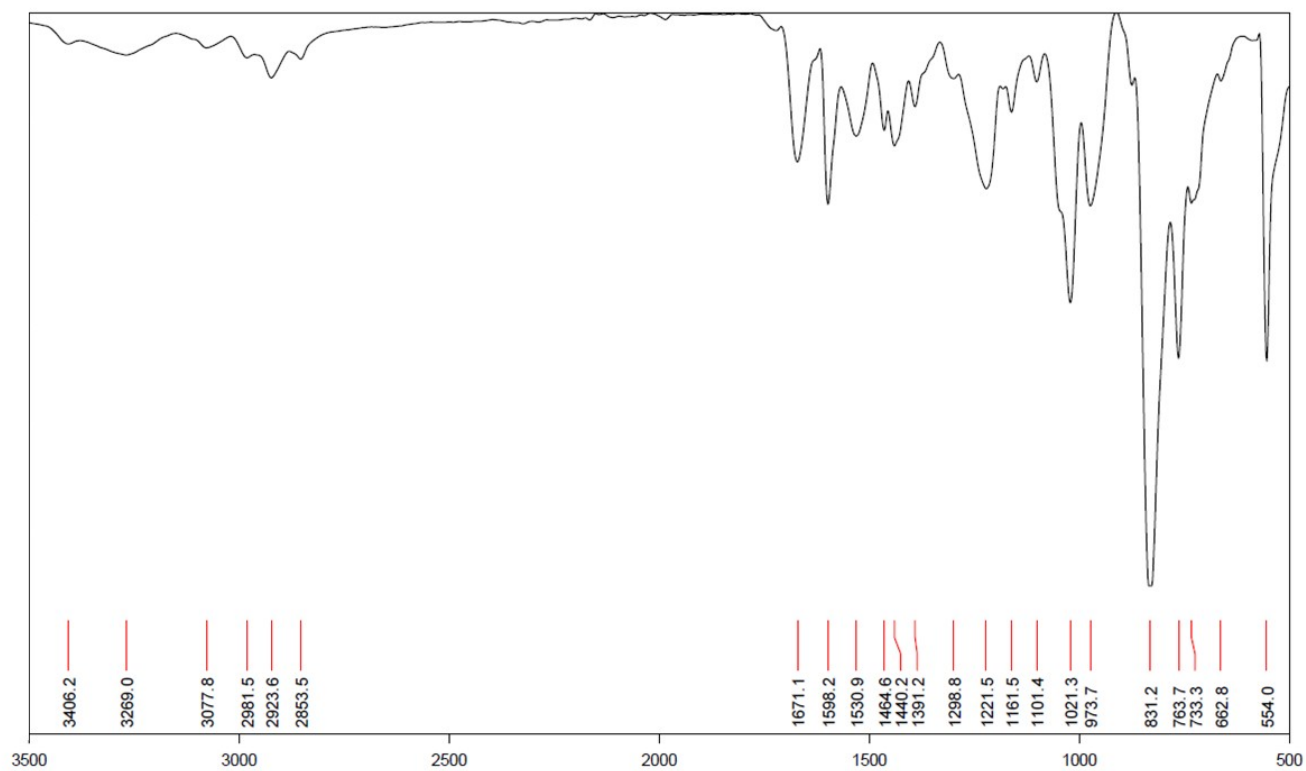

**Figure S13.** FTIR spectrum of **Ru(N<sub>3</sub>P<sub>3</sub>phen)** (neat).

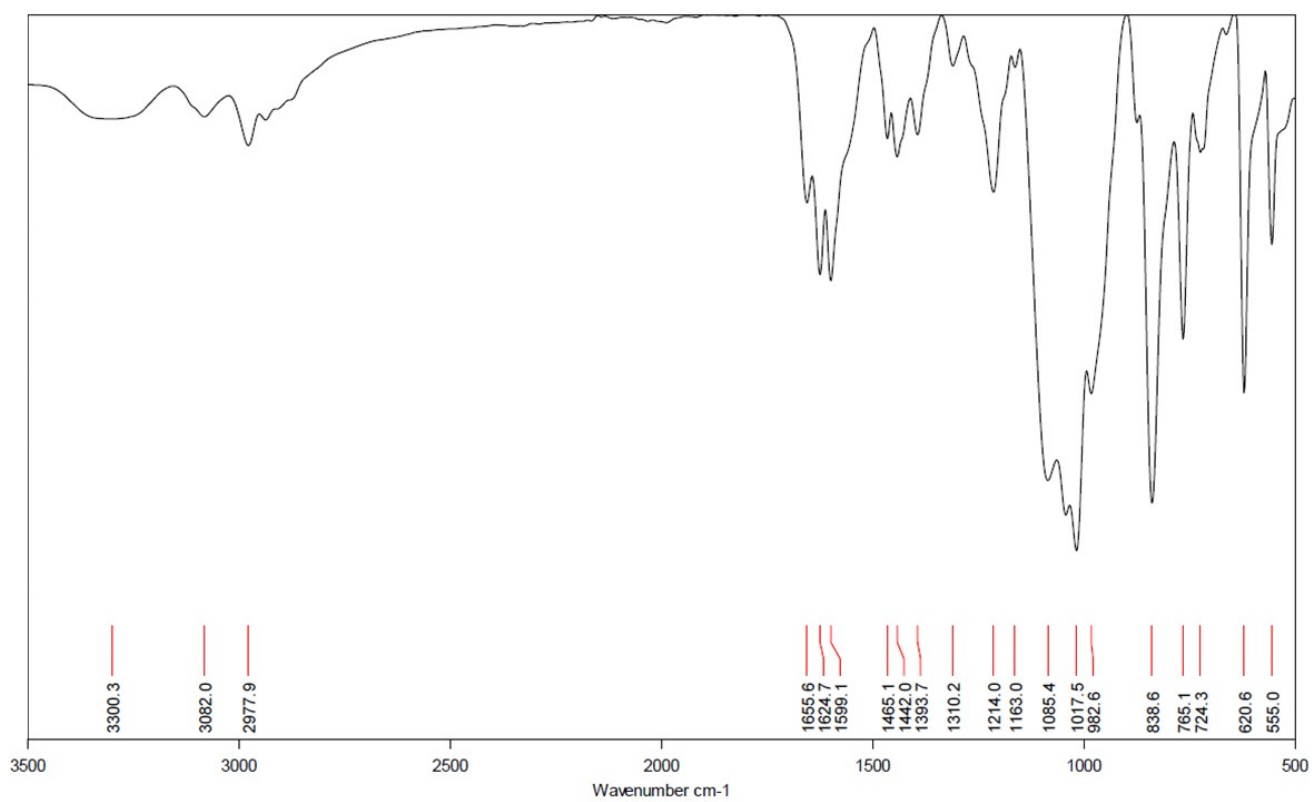

**Figure S14.** FTIR spectrum of **{Cu[Ru(N<sub>3</sub>P<sub>3</sub>phen)]}(ClO<sub>4</sub>)<sub>2</sub>** (neat).

#### 4. DFT studies of the zinc complex with Ru(N<sub>3</sub>P<sub>3</sub>phen)

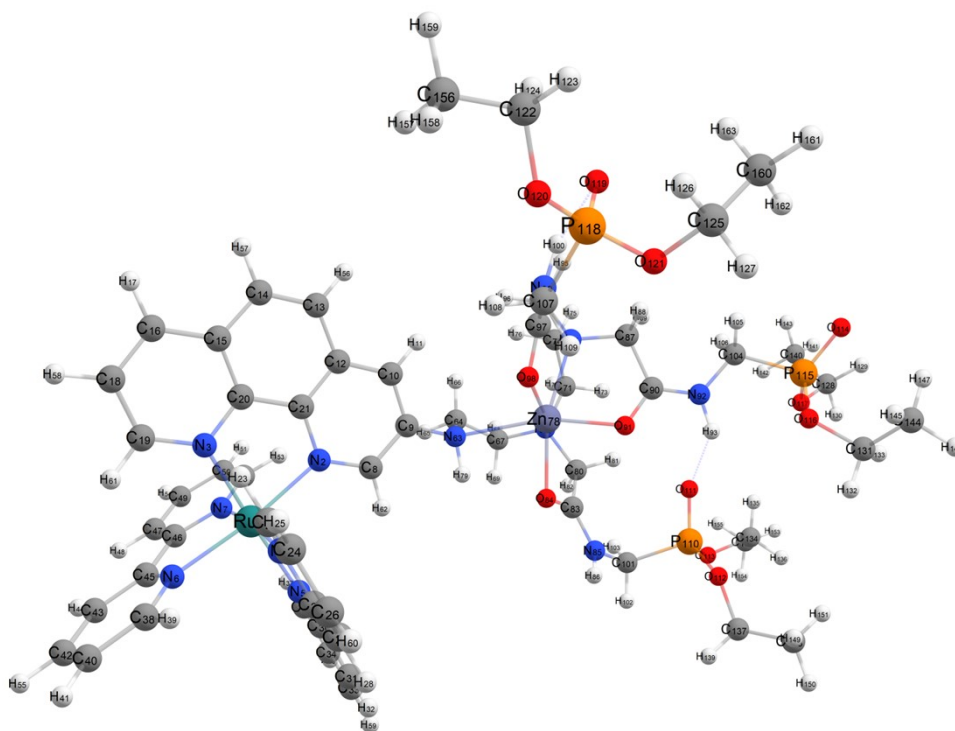

**Figure S15.** DFT calculated geometry of the bimetallic  $\{\text{Zn}[\text{Ru}(\text{N}_3\text{P}_3\text{phen})]\}^{4+}$  complex at the B3LYP/6-31G(d,p) level (see text). The more stable *fac*-isomer is shown. Color code for the atoms: C (dark grey), H (light grey), N (blue), O (red), P (orange), Ru (green); Zn (violet).

NUCLEAR COORDINATES -----

| ATOM | X            | Y            | Z            |
|------|--------------|--------------|--------------|
| Ru   | 7.769773512  | 14.221040187 | -4.079440352 |
| N    | 8.986807578  | 15.934643300 | -4.469475560 |
| N    | 7.286496358  | 15.451499927 | -2.434920383 |
| N    | 9.413092938  | 13.230776914 | -3.216840550 |
| N    | 8.426403081  | 12.997075928 | -5.660246727 |
| N    | 6.372592191  | 12.716312036 | -3.617597325 |
| N    | 6.017086090  | 14.934115187 | -5.021223698 |
| C    | 9.831834272  | 16.160673682 | -5.482241658 |
| C    | 10.536429262 | 17.377478763 | -5.652344959 |
| C    | 10.342154131 | 18.382759899 | -4.716638662 |
| H    | 10.858663576 | 19.332098788 | -4.810307879 |
| C    | 9.465140143  | 18.178750461 | -3.634023807 |
| C    | 9.210734892  | 19.172898135 | -2.628770561 |
| C    | 8.351547305  | 18.927899149 | -1.599467763 |
| C    | 7.669200723  | 17.668809191 | -1.483885642 |
| C    | 6.770365713  | 17.364765234 | -0.437707236 |
| H    | 6.564831997  | 18.100827686 | 0.333395564  |
| C    | 6.160780417  | 16.124247748 | -0.414258206 |
| C    | 6.441199441  | 15.195694696 | -1.429565805 |
| C    | 7.897879092  | 16.675006952 | -2.465151568 |

|    |              |              |              |
|----|--------------|--------------|--------------|
| C  | 8.804390757  | 16.928269475 | -3.544566184 |
| C  | 9.876164445  | 13.422858348 | -1.964996740 |
| H  | 9.370271791  | 14.183731391 | -1.383401921 |
| C  | 10.924969510 | 12.686032120 | -1.426942542 |
| H  | 11.247324168 | 12.872639641 | -0.408732245 |
| C  | 11.531765761 | 11.709134562 | -2.215583476 |
| C  | 11.069419519 | 11.513187153 | -3.513860888 |
| H  | 11.530325534 | 10.758507648 | -4.138774401 |
| C  | 10.007621761 | 12.283503385 | -3.998935351 |
| C  | 9.439097612  | 12.135037665 | -5.353608765 |
| C  | 9.874040785  | 11.178929850 | -6.277134207 |
| H  | 10.666304346 | 10.487285180 | -6.018931912 |
| C  | 9.270999091  | 11.100025061 | -7.529066936 |
| C  | 8.244025442  | 11.991286642 | -7.837917490 |
| H  | 7.738822935  | 11.963413223 | -8.796887058 |
| C  | 7.853534264  | 12.918563259 | -6.878580498 |
| H  | 7.049696784  | 13.619080049 | -7.070168472 |
| C  | 6.625634415  | 11.608389181 | -2.891025996 |
| H  | 7.629115855  | 11.515118832 | -2.495733303 |
| C  | 5.668043031  | 10.630992522 | -2.644820113 |
| H  | 5.926895355  | 9.761840028  | -2.050711537 |
| C  | 4.389605264  | 10.796098824 | -3.175052349 |
| C  | 4.118210558  | 11.937255895 | -3.924749231 |
| H  | 3.129520760  | 12.079994554 | -4.342394464 |
| C  | 5.121012215  | 12.889168146 | -4.133527267 |
| C  | 4.916571534  | 14.137365777 | -4.893898248 |
| C  | 3.687288471  | 14.512600803 | -5.445914149 |
| H  | 2.819590361  | 13.874030413 | -5.338842205 |
| C  | 3.572966190  | 15.718923171 | -6.129751809 |
| C  | 4.700148914  | 16.531124564 | -6.249115393 |
| H  | 4.657712383  | 17.482723928 | -6.766735425 |
| C  | 5.894865732  | 16.102171820 | -5.683565204 |
| H  | 6.793535306  | 16.703133014 | -5.753096594 |
| H  | 2.621444181  | 16.018978901 | -6.555800595 |
| H  | 3.616694823  | 10.053456927 | -3.007823087 |
| H  | 9.712298299  | 20.132251162 | -2.705114567 |
| H  | 8.165666128  | 19.687930178 | -0.847110743 |
| H  | 5.465939055  | 15.854302350 | 0.373070256  |
| H  | 9.591246599  | 10.350394431 | -8.244915919 |
| H  | 12.346618259 | 11.107365578 | -1.827356364 |
| H  | 5.971642364  | 14.219254142 | -1.431890503 |
| H  | 9.947004191  | 15.351633724 | -6.197224383 |
| N  | 11.390417967 | 17.574885198 | -6.786242887 |
| C  | 10.865408487 | 18.570148675 | -7.761266632 |
| H  | 9.816391752  | 18.366493607 | -8.015273560 |
| H  | 10.888363995 | 19.557249400 | -7.292662552 |
| C  | 11.666187715 | 18.545681119 | -9.062233924 |
| H  | 11.240652651 | 19.285845491 | -9.751144887 |
| H  | 11.517443931 | 17.567043626 | -9.528230652 |
| N  | 13.136832388 | 18.758596949 | -8.910718740 |
| C  | 13.552198302 | 20.186408515 | -9.054840306 |
| H  | 12.913959524 | 20.712674924 | -9.774826066 |
| H  | 14.562356295 | 20.202368979 | -9.469986973 |
| C  | 13.538830145 | 20.953479906 | -7.723563457 |
| H  | 13.891197310 | 21.977826096 | -7.905313414 |
| H  | 12.517462298 | 21.034502248 | -7.343239661 |
| N  | 14.353315846 | 20.262993648 | -6.696229188 |
| Zn | 13.833834163 | 18.055875172 | -6.939640645 |
| H  | 11.533501389 | 16.686744773 | -7.266182151 |

|   |              |              |               |
|---|--------------|--------------|---------------|
| C | 13.879227437 | 17.869109582 | -9.840650759  |
| H | 14.888746179 | 18.247051380 | -10.022873991 |
| H | 13.374176936 | 17.795416807 | -10.812338644 |
| C | 14.048339130 | 16.484554488 | -9.215814679  |
| O | 13.677220113 | 16.284747361 | -8.028299221  |
| N | 14.574678456 | 15.498849792 | -9.943395720  |
| H | 14.743314788 | 14.646934965 | -9.418268183  |
| C | 15.814747180 | 20.401975097 | -6.920198520  |
| H | 16.325042563 | 20.491351457 | -5.954665440  |
| H | 16.037117875 | 21.320930519 | -7.473299554  |
| C | 16.388651408 | 19.174282920 | -7.631315034  |
| O | 15.756356963 | 18.083997503 | -7.565746843  |
| N | 17.523539834 | 19.281553863 | -8.297267547  |
| H | 17.786091777 | 18.451515851 | -8.838679029  |
| C | 13.990658026 | 20.558861727 | -5.302006790  |
| H | 14.516357813 | 21.431292337 | -4.896070196  |
| H | 12.919265965 | 20.779214983 | -5.252001287  |
| C | 14.238945553 | 19.302287014 | -4.456128802  |
| O | 13.953570569 | 18.168671149 | -4.939070100  |
| N | 14.720987586 | 19.484944273 | -3.244743237  |
| H | 15.029466183 | 20.417932125 | -2.935611949  |
| C | 15.182028552 | 15.589479124 | -11.275228686 |
| H | 15.129519757 | 14.604880057 | -11.745518196 |
| H | 14.614735597 | 16.273250662 | -11.910197701 |
| C | 18.414438054 | 20.445312597 | -8.308426642  |
| H | 18.561307974 | 20.823935444 | -7.293119998  |
| H | 18.010322461 | 21.255927747 | -8.925541860  |
| C | 15.106014202 | 18.437974846 | -2.291533095  |
| H | 14.235312339 | 18.058565030 | -1.749585469  |
| H | 15.598124738 | 17.611863064 | -2.808080643  |
| P | 16.934534155 | 16.197181211 | -11.193414759 |
| O | 17.009094865 | 17.445215607 | -10.376946037 |
| O | 17.809416108 | 15.023627812 | -10.556393063 |
| O | 17.244246526 | 16.306678555 | -12.749475814 |
| O | 21.091301112 | 21.075728539 | -8.377038857  |
| P | 20.127404416 | 20.102172615 | -8.935611980  |
| O | 20.221431145 | 18.552928015 | -8.531230471  |
| O | 20.012173204 | 20.072159133 | -10.541182547 |
| P | 16.269812365 | 19.298531256 | -1.120982019  |
| O | 16.273300385 | 20.749453194 | -1.490307390  |
| O | 15.723780639 | 18.955371064 | 0.340117932   |
| O | 17.591909118 | 18.439195126 | -1.346012034  |
| C | 15.696744380 | 19.952533073 | 1.430551938   |
| H | 16.660814427 | 19.893546829 | 1.942125111   |
| H | 15.590128409 | 20.944541879 | 0.986166718   |
| C | 18.774107933 | 18.536760908 | -0.469226610  |
| H | 18.429374397 | 18.479419281 | 0.567348967   |
| H | 19.334764253 | 17.628507383 | -0.693608888  |
| C | 20.724281479 | 21.069406978 | -11.360517148 |
| H | 21.655305736 | 21.332481619 | -10.855575660 |
| H | 20.955521436 | 20.538708860 | -12.285882994 |
| C | 21.452602883 | 17.786870893 | -8.780666342  |
| H | 21.109594753 | 16.753120332 | -8.858703298  |
| H | 21.857936777 | 18.087531085 | -9.751625294  |
| C | 18.418471440 | 17.047002649 | -13.270746692 |
| H | 18.559767977 | 17.934077752 | -12.647516490 |
| H | 19.286372971 | 16.390887769 | -13.162471648 |
| C | 18.242860042 | 13.812032410 | -11.272554806 |
| H | 18.192479167 | 13.996826825 | -12.348658199 |

|   |              |              |               |
|---|--------------|--------------|---------------|
| H | 17.531505797 | 13.020298619 | -11.016429371 |
| C | 19.865858469 | 22.292915382 | -11.612351981 |
| H | 20.389484273 | 22.969475397 | -12.294723491 |
| H | 18.910995594 | 22.020790396 | -12.072243971 |
| H | 19.679718484 | 22.842921051 | -10.684721966 |
| C | 22.458054995 | 17.968895053 | -7.660261262  |
| H | 22.031320837 | 17.660243414 | -6.702068415  |
| H | 23.336805391 | 17.347183839 | -7.858581878  |
| H | 22.780482884 | 19.009637298 | -7.585000242  |
| C | 19.646222503 | 13.461781839 | -10.825355077 |
| H | 19.685073817 | 13.295618880 | -9.746062133  |
| H | 19.966996941 | 12.543469921 | -11.326232016 |
| H | 20.351147282 | 14.255583056 | -11.085332576 |
| C | 18.147669776 | 17.389740173 | -14.717975964 |
| H | 19.017282862 | 17.908890768 | -15.131701397 |
| H | 17.978551694 | 16.488556678 | -15.312353651 |
| H | 17.278996392 | 18.046111329 | -14.813818698 |
| C | 14.554273192 | 19.605099574 | 2.358480793   |
| H | 13.591754295 | 19.678297684 | 1.844026473   |
| H | 14.666682180 | 18.594760918 | 2.759755145   |
| H | 14.548255029 | 20.306309728 | 3.198306246   |
| C | 19.586294908 | 19.786960228 | -0.743861281  |
| H | 20.478587489 | 19.779339205 | -0.110282415  |
| H | 19.910910348 | 19.819708178 | -1.787016613  |
| H | 19.020664288 | 20.696632754 | -0.526135641  |

## 5. Characterization of Ru(N<sub>2</sub>P<sub>2</sub>phen)@TiO<sub>2</sub> and Ru(N<sub>3</sub>P<sub>3</sub>phen)@TiO<sub>2</sub>

**Table S1.** Chemical composition of Ru(N<sub>2</sub>P<sub>2</sub>phen)@TiO<sub>2</sub> and Ru(N<sub>3</sub>P<sub>3</sub>phen)@TiO<sub>2</sub> materials.

| Material                                                | Calculated formula                                                                                                                                                                                                                                                                                             | Elemental analysis <sup>a</sup> |       |      |      |       |      |      |
|---------------------------------------------------------|----------------------------------------------------------------------------------------------------------------------------------------------------------------------------------------------------------------------------------------------------------------------------------------------------------------|---------------------------------|-------|------|------|-------|------|------|
|                                                         |                                                                                                                                                                                                                                                                                                                |                                 | %C    | %H   | %N   | %Ti   | %P   | %Ru  |
| Ru(N <sub>2</sub> P <sub>2</sub> phen)@TiO <sub>2</sub> | (C <sub>40</sub> H <sub>42</sub> N <sub>10</sub> O <sub>8</sub> P <sub>2</sub> Ru)(PF <sub>6</sub> ) <sub>0.5</sub> Br <sub>1.5</sub> (TiO <sub>2</sub> ) <sub>74</sub><br>(H <sub>2</sub> O) <sub>44</sub> (C <sub>3</sub> H <sub>7</sub> OH) <sub>11</sub> (C <sub>3</sub> H <sub>7</sub> NO) <sub>0.5</sub> | found                           | 10.75 | 2.49 | 2.19 | 42.14 | 0.92 | 1.20 |
|                                                         |                                                                                                                                                                                                                                                                                                                | calcd                           | 10.34 | 2.54 | 2.08 | 41.78 | 0.91 | 1.19 |
| Ru(N <sub>3</sub> P <sub>3</sub> phen)@TiO <sub>2</sub> | (C <sub>45</sub> H <sub>53</sub> N <sub>12</sub> O <sub>12</sub> P <sub>3</sub> Ru)(PF <sub>6</sub> ) <sub>0.5</sub> Br <sub>1.5</sub> (TiO <sub>2</sub> ) <sub>71</sub><br>(H <sub>2</sub> O) <sub>49</sub> (C <sub>3</sub> H <sub>7</sub> OH) <sub>8</sub> (C <sub>3</sub> H <sub>7</sub> NO) <sub>0.3</sub> | found                           | 10.26 | 2.48 | 2.32 | 41.23 | 1.30 | 1.22 |
|                                                         |                                                                                                                                                                                                                                                                                                                | calcd                           | 10.36 | 2.76 | 2.29 | 40.98 | 1.31 | 1.22 |

<sup>a</sup> P, Ti, and Ru contents were determined by ICP-OES and C, H and N contents were found by combustion analysis.

**Table S2.** Chemical composition of solids Ru(N<sub>2</sub>P<sub>2</sub>phen)@TiO<sub>2</sub> and Ru(N<sub>3</sub>P<sub>3</sub>phen)@TiO<sub>2</sub>.

| Material                                                | Calculated formula                                                                                                                                                                                                                                                                                             | Elemental analysis <sup>a</sup> |     |      |      |       |      |      |
|---------------------------------------------------------|----------------------------------------------------------------------------------------------------------------------------------------------------------------------------------------------------------------------------------------------------------------------------------------------------------------|---------------------------------|-----|------|------|-------|------|------|
|                                                         |                                                                                                                                                                                                                                                                                                                |                                 | N/P | Ti/P | Ti/N | Ti/Ru | N/Ru | P/Ru |
| Ru(N <sub>2</sub> P <sub>2</sub> phen)@TiO <sub>2</sub> | (C <sub>40</sub> H <sub>42</sub> N <sub>10</sub> O <sub>8</sub> P <sub>2</sub> Ru)(PF <sub>6</sub> ) <sub>0.5</sub> Br <sub>1.5</sub> (TiO <sub>2</sub> ) <sub>74</sub><br>(H <sub>2</sub> O) <sub>44</sub> (C <sub>3</sub> H <sub>7</sub> OH) <sub>11</sub> (C <sub>3</sub> H <sub>7</sub> NO) <sub>0.5</sub> | found                           | 5.3 | 29.6 | 5.6  | 74.1  | 13.2 | 2.5  |
|                                                         |                                                                                                                                                                                                                                                                                                                | calcd                           | 5.0 | 29.6 | 5.9  | 74.0  | 12.6 | 2.5  |
| Ru(N <sub>3</sub> P <sub>3</sub> phen)@TiO <sub>2</sub> | (C <sub>45</sub> H <sub>53</sub> N <sub>12</sub> O <sub>12</sub> P <sub>3</sub> Ru)(PF <sub>6</sub> ) <sub>0.5</sub> Br <sub>1.5</sub> (TiO <sub>2</sub> ) <sub>71</sub><br>(H <sub>2</sub> O) <sub>49</sub> (C <sub>3</sub> H <sub>7</sub> OH) <sub>8</sub> (C <sub>3</sub> H <sub>7</sub> NO) <sub>0.3</sub> | found                           | 3.9 | 20.5 | 5.2  | 71.3  | 13.7 | 3.5  |
|                                                         |                                                                                                                                                                                                                                                                                                                | calcd                           | 3.9 | 20.3 | 5.2  | 71.0  | 13.6 | 3.5  |

<sup>a</sup> P, Ti, and Ru contents were determined by ICP-OES and C, H and N contents were found by combustion analysis.

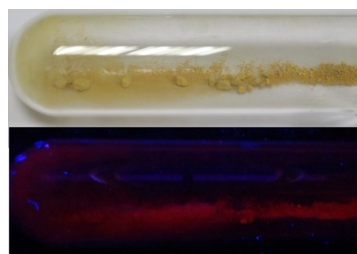

(a)

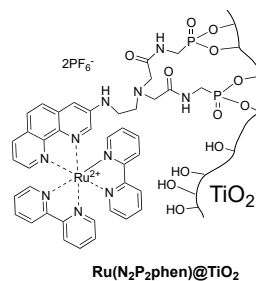

(b)

**Figure S16.** (a) Picture of the Ru(N<sub>2</sub>P<sub>2</sub>phen)@TiO<sub>2</sub> material taken under visible (top) and UV (bottom) light. (b) Schematic presentation of Ru(N<sub>2</sub>P<sub>2</sub>phen)@TiO<sub>2</sub>.

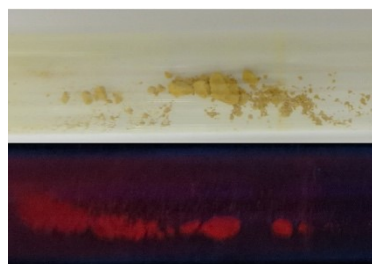

(a)

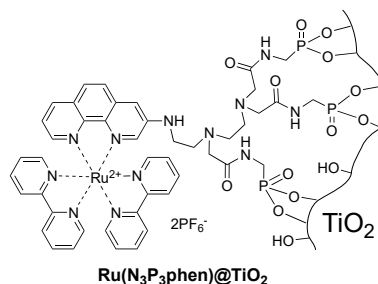

(b)

**Figure S17.** (a) Picture of the Ru(N<sub>3</sub>P<sub>3</sub>phen)@TiO<sub>2</sub> material taken under visible (top) and UV (bottom) light. (b) Schematic presentation of Ru(N<sub>3</sub>P<sub>3</sub>phen)@TiO<sub>2</sub>.

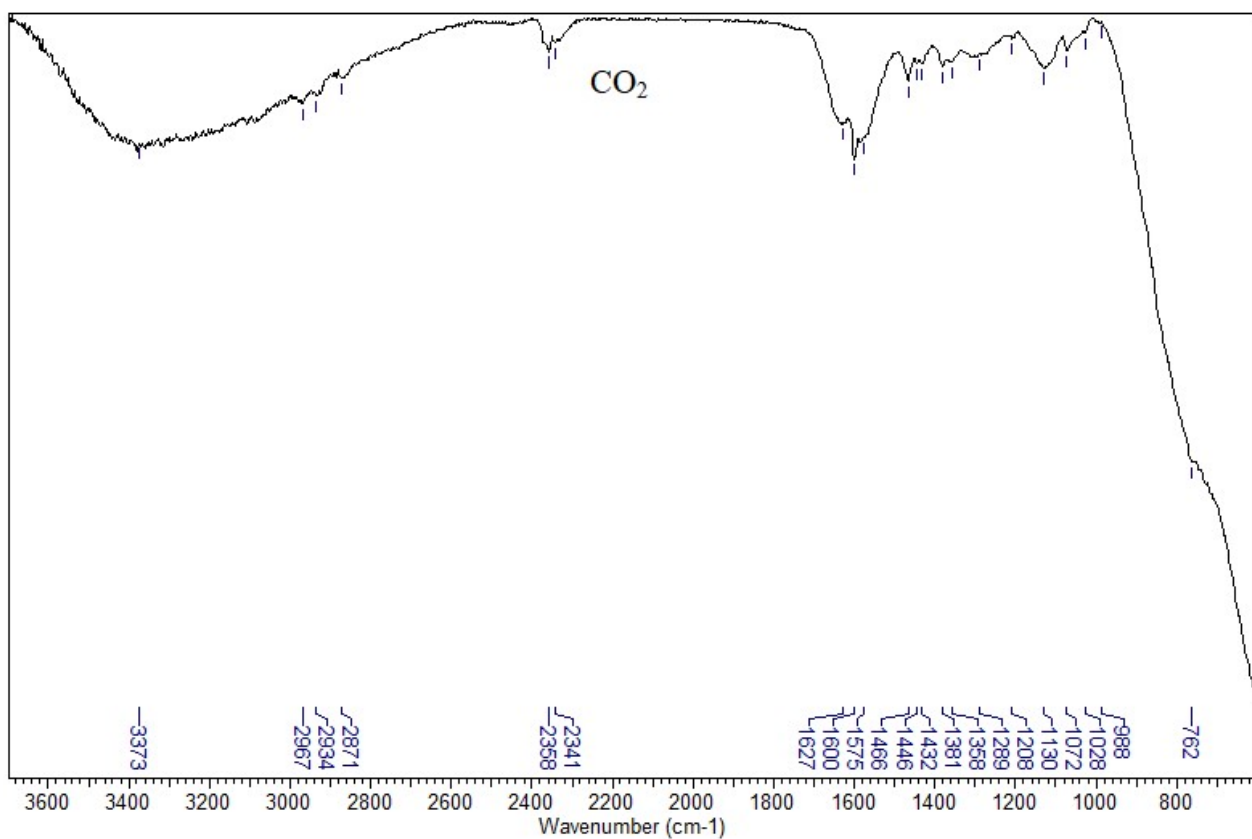

**Figure S18.** FTIR spectrum of  $\text{Ru}(\text{N}_2\text{P}_2\text{phen})@\text{TiO}_2$  (neat).

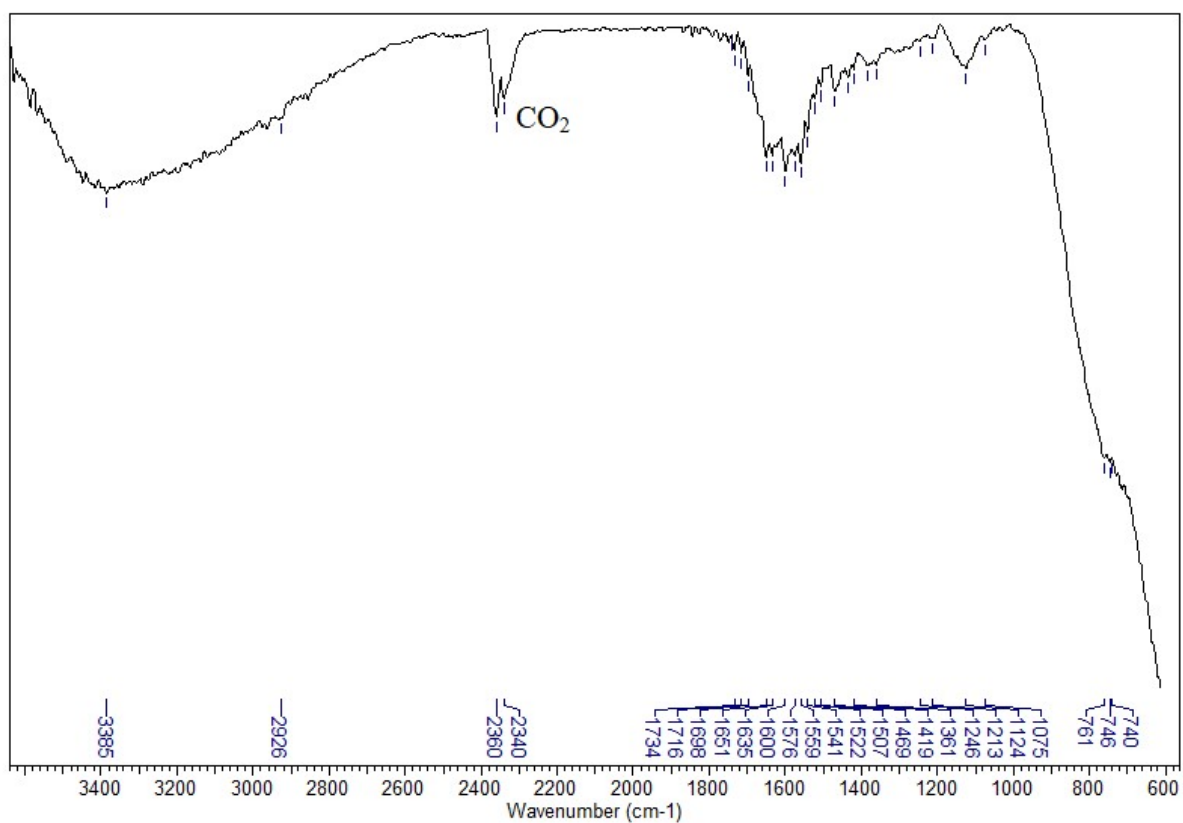

**Figure S19.** FTIR spectrum of  $\text{Ru}(\text{N}_3\text{P}_3\text{phen})@\text{TiO}_2$  (neat).



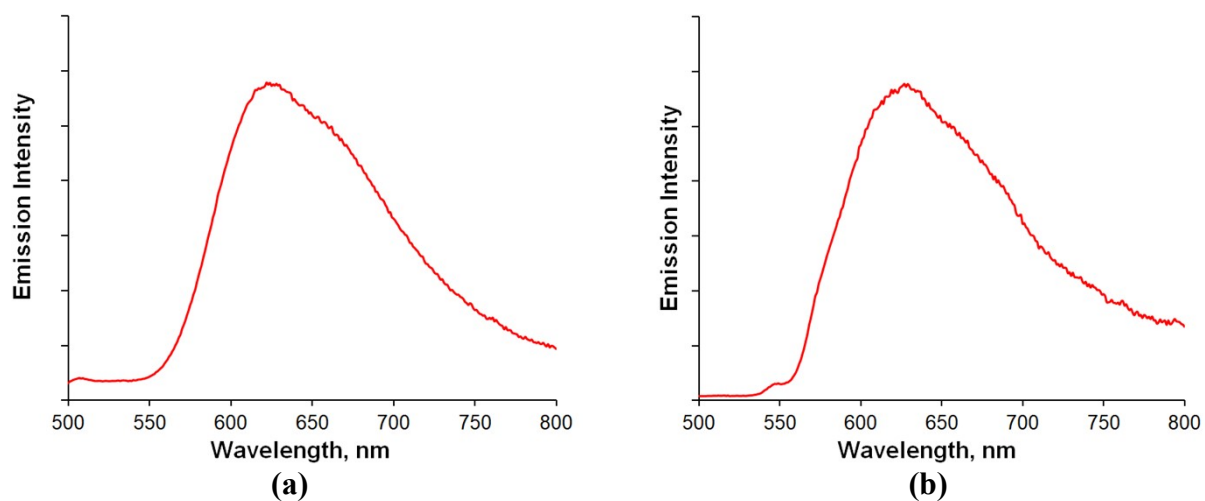

**Figure S20.** Emission spectra of (a) **Ru(N<sub>2</sub>P<sub>2</sub>phen)@TiO<sub>2</sub>** (powder,  $\lambda_{\text{ex}} = 450$  nm) and (b) **Ru(N<sub>3</sub>P<sub>3</sub>phen)@TiO<sub>2</sub>** (powder,  $\lambda_{\text{ex}} = 450$  nm).

## 6. Studies of sensing properties of $\text{Ru}(\text{N}_2\text{P}_2\text{phen})@\text{TiO}_2$

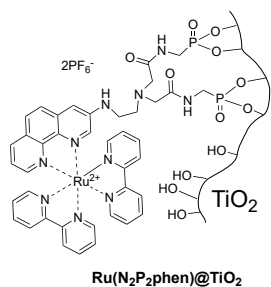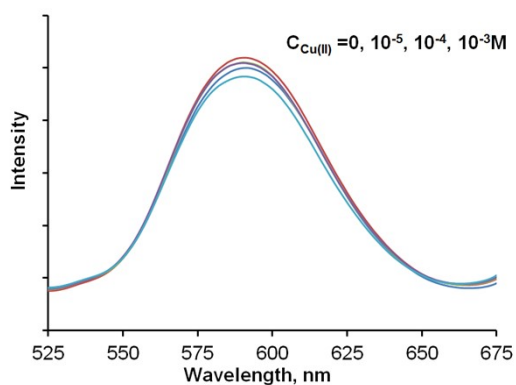

**Figure S21.** Evolution of the average emission spectrum of a suspension of  $\text{Ru}(\text{N}_2\text{P}_2\text{phen})@\text{TiO}_2$  in water ( $\lambda_{\text{ex}} = 380 \text{ nm}$ ) in the presence of  $\text{Cu}(\text{ClO}_4)_2$  ( $c = 0-10^{-3} \text{ M}$ ).

**Comment [MM]:** The range is not matching with the conc. given in the Figure.

The color code should be given

## 7. Sorption studies of Cu<sup>2+</sup> ions by TiO<sub>2</sub> and Ru(N<sub>3</sub>P<sub>3</sub>phen)@TiO<sub>2</sub>.

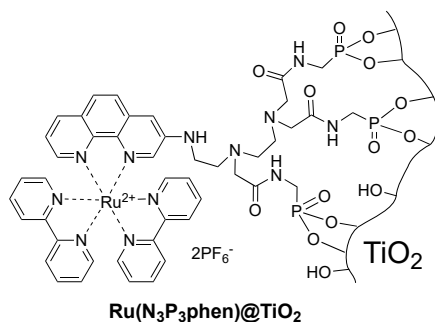

**Procedure.** To a standard solution of Cu(ClO<sub>4</sub>)<sub>2</sub> ( $c = 133.5 \mu\text{M} = 8545 \mu\text{g/L}$ ), the sorbent was added in a glass vial in air. The suspension was stirred with a magnetic stirrer for 15 min. About 1 mL was passed through a Nylon Syringe Filter (0.22  $\mu\text{m}$ ) before the copper concentration in the filtrate was determined by ICP-OES. The loads and the results are summarized in Table S3.

**Table S3.** Adsorption of Cu(II) ions by TiO<sub>2</sub> and Ru(N<sub>3</sub>P<sub>3</sub>phen)@TiO<sub>2</sub>.

| Sorbent                                                   | Sorbent (mg) | Cu(ClO <sub>4</sub> ) <sub>2</sub> solution (mL) | Cu <sub>tot</sub> /Ru molar ratio | [Cu] in the filtrate <sup>a</sup> ( $\mu\text{g/L}$ ) |
|-----------------------------------------------------------|--------------|--------------------------------------------------|-----------------------------------|-------------------------------------------------------|
| TiO <sub>2</sub>                                          | 9            | 12                                               | -                                 | 7879.4                                                |
| <b>Ru(N<sub>3</sub>P<sub>3</sub>phen)@TiO<sub>2</sub></b> | 10           | 3                                                | 0.33                              | 702.1                                                 |
| <b>Ru(N<sub>3</sub>P<sub>3</sub>phen)@TiO<sub>2</sub></b> | 10           | 12                                               | 1.23                              | 4371.8                                                |

<sup>a</sup> Copper(II) concentrations before and after sorption (15 min, r. t.) by the studied solid were determined by ICP-OES.

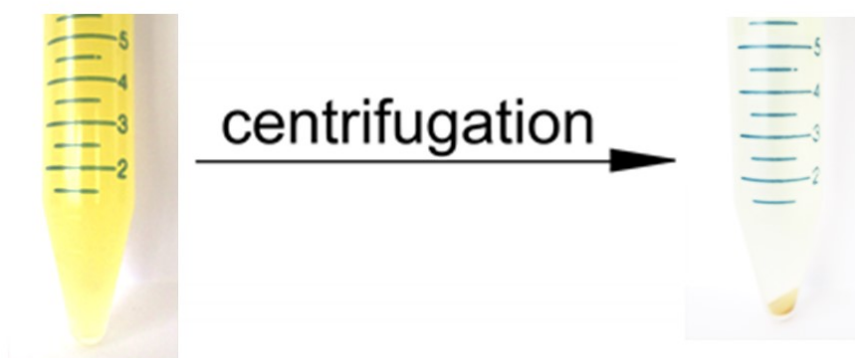

**Figure 22.** Picture of a suspension of Ru(N<sub>3</sub>P<sub>3</sub>phen)@TiO<sub>2</sub> in water before and after centrifugation.

## 8. NMR spectra

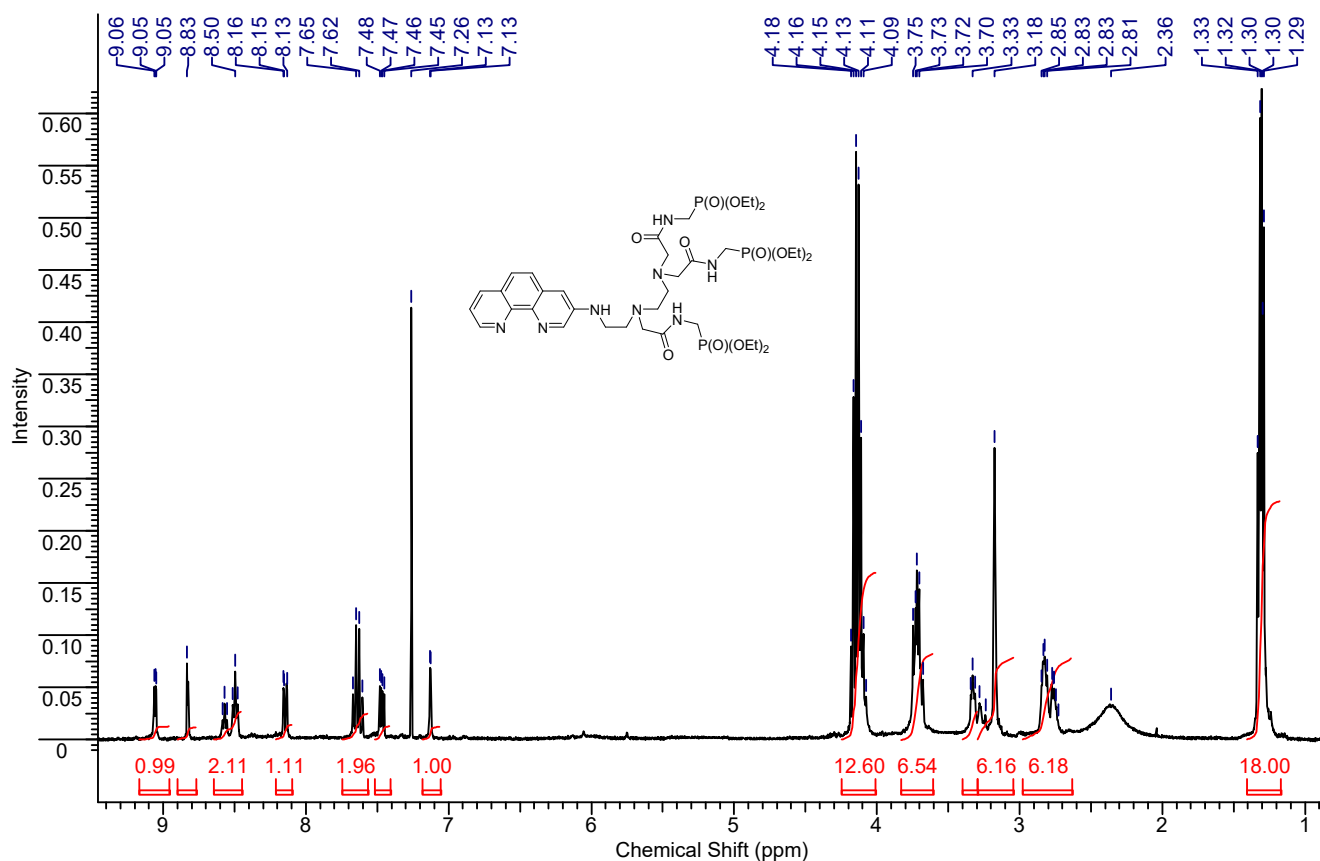

Figure S23.  $^1\text{H}$  NMR spectrum of  $\text{N}_3\text{P}_3\text{phen}$  ( $\text{CDCl}_3$ , 400 MHz, 300 K).

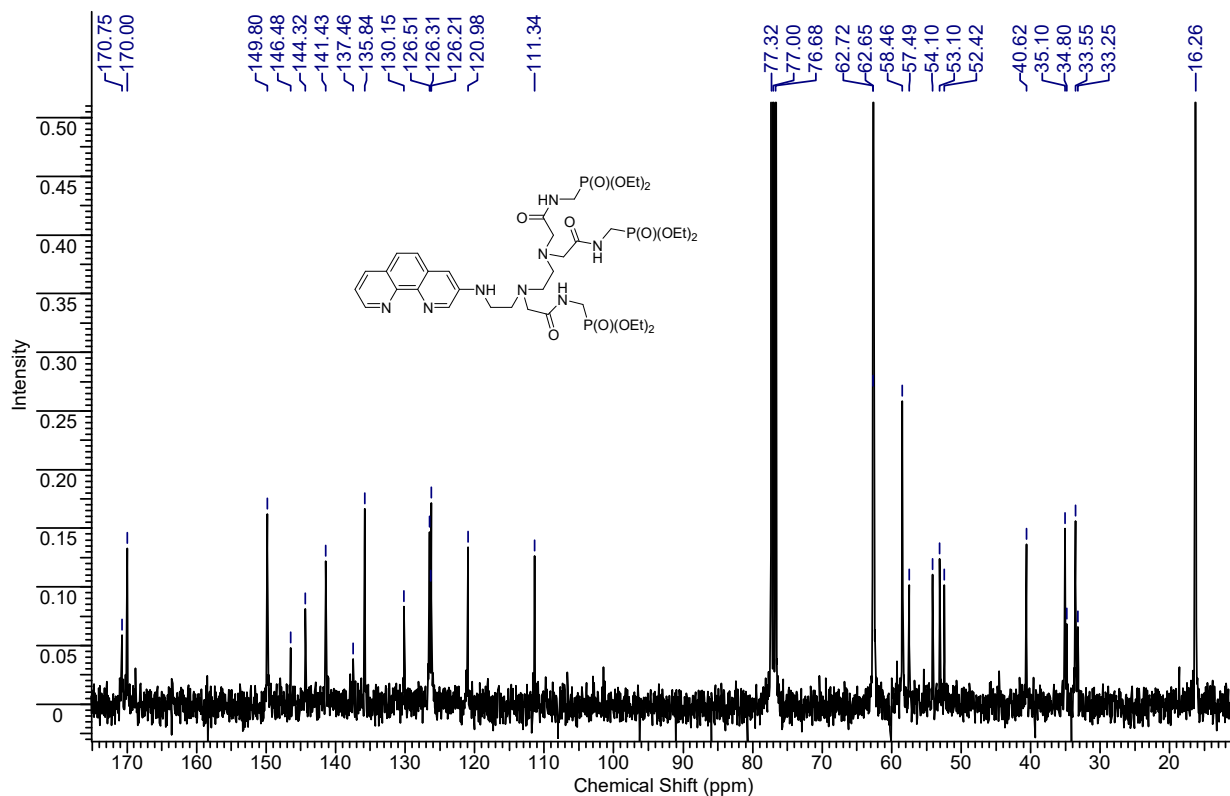

Figure S24.  $^{13}\text{C}$  NMR spectrum of  $\text{N}_3\text{P}_3\text{phen}$  ( $\text{CDCl}_3$ , 100.6 MHz, 300 K).

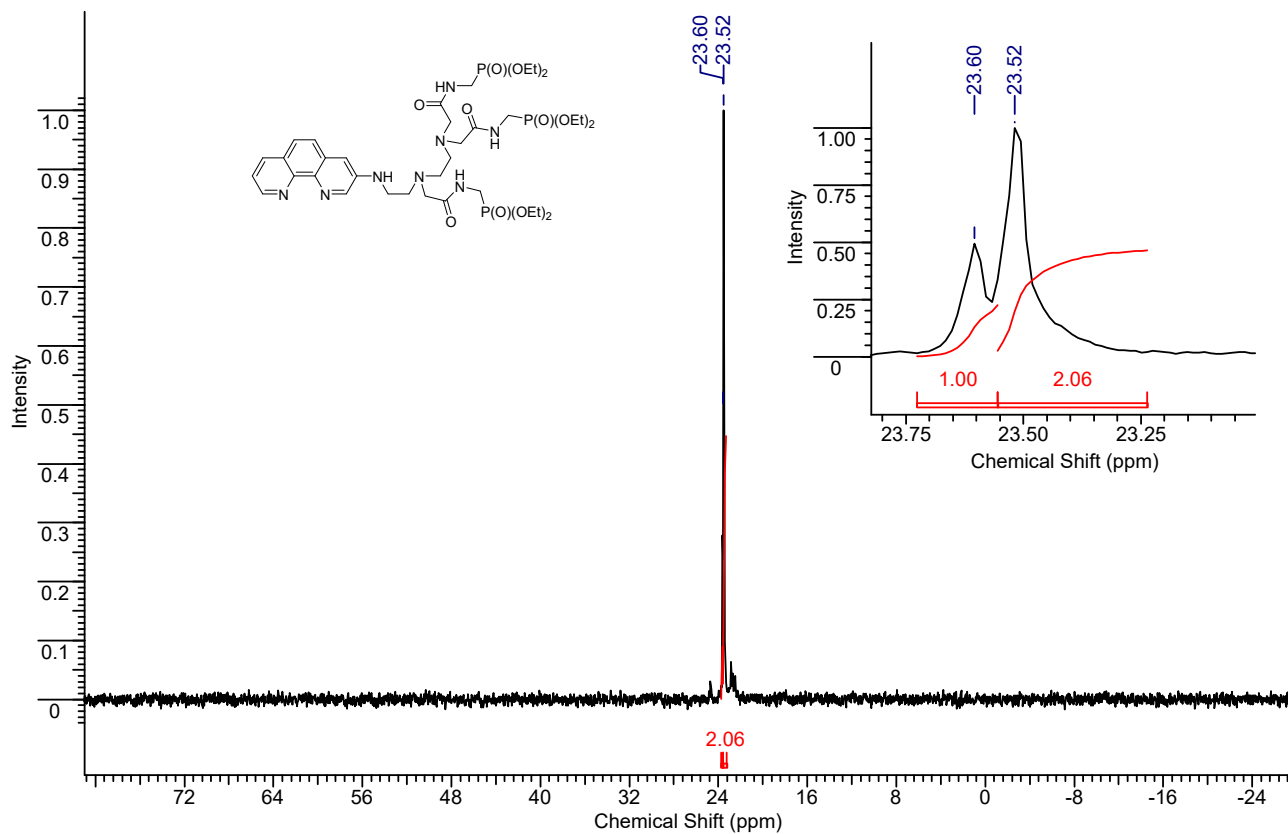

Figure S25.  $^{31}\text{P}$  NMR spectrum of  $\text{N}_3\text{P}_3\text{phen}$  ( $\text{CDCl}_3$ , 162.5 MHz, 300 K).

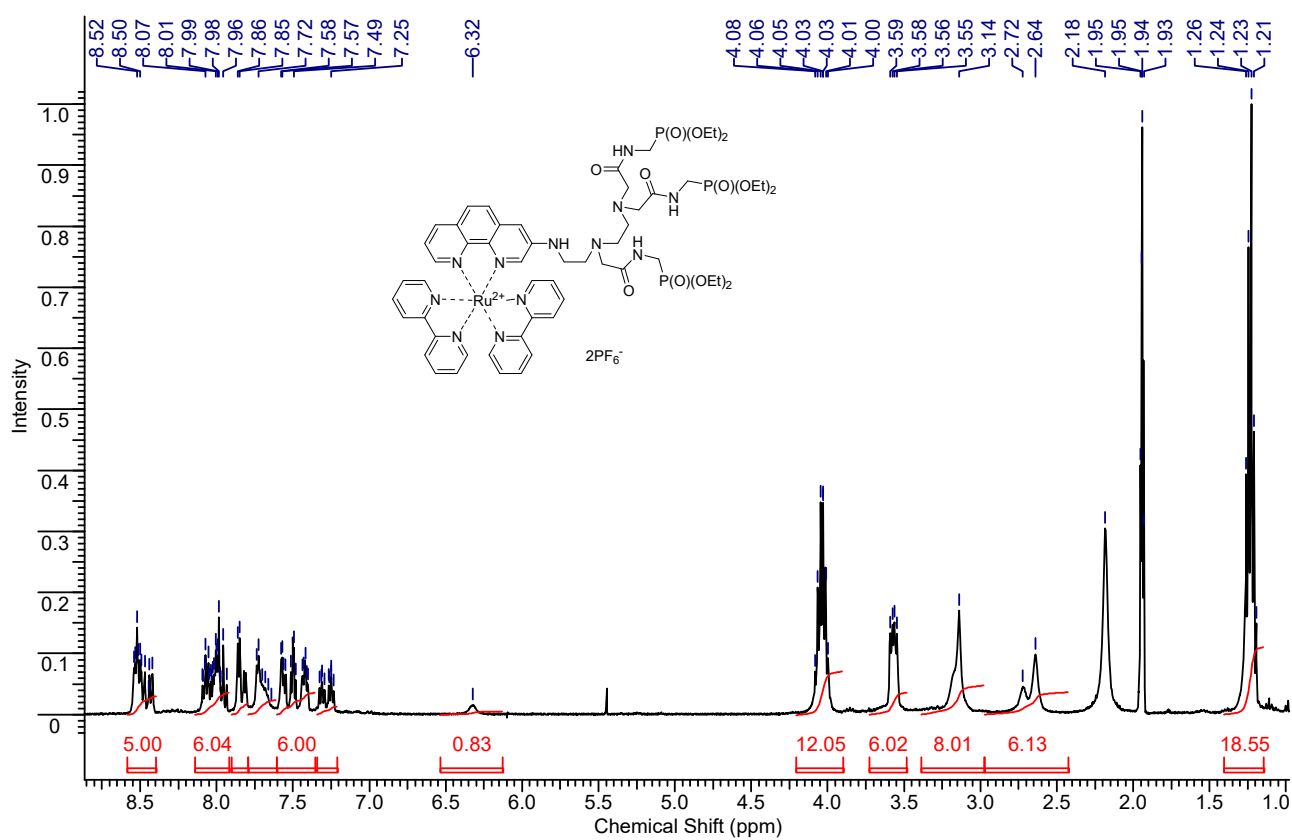

Figure S26.  $^1\text{H}$  NMR spectrum of  $\text{Ru}(\text{N}_3\text{P}_3\text{phen})$  ( $\text{CD}_3\text{CN}$ , 400 MHz, 300 K).

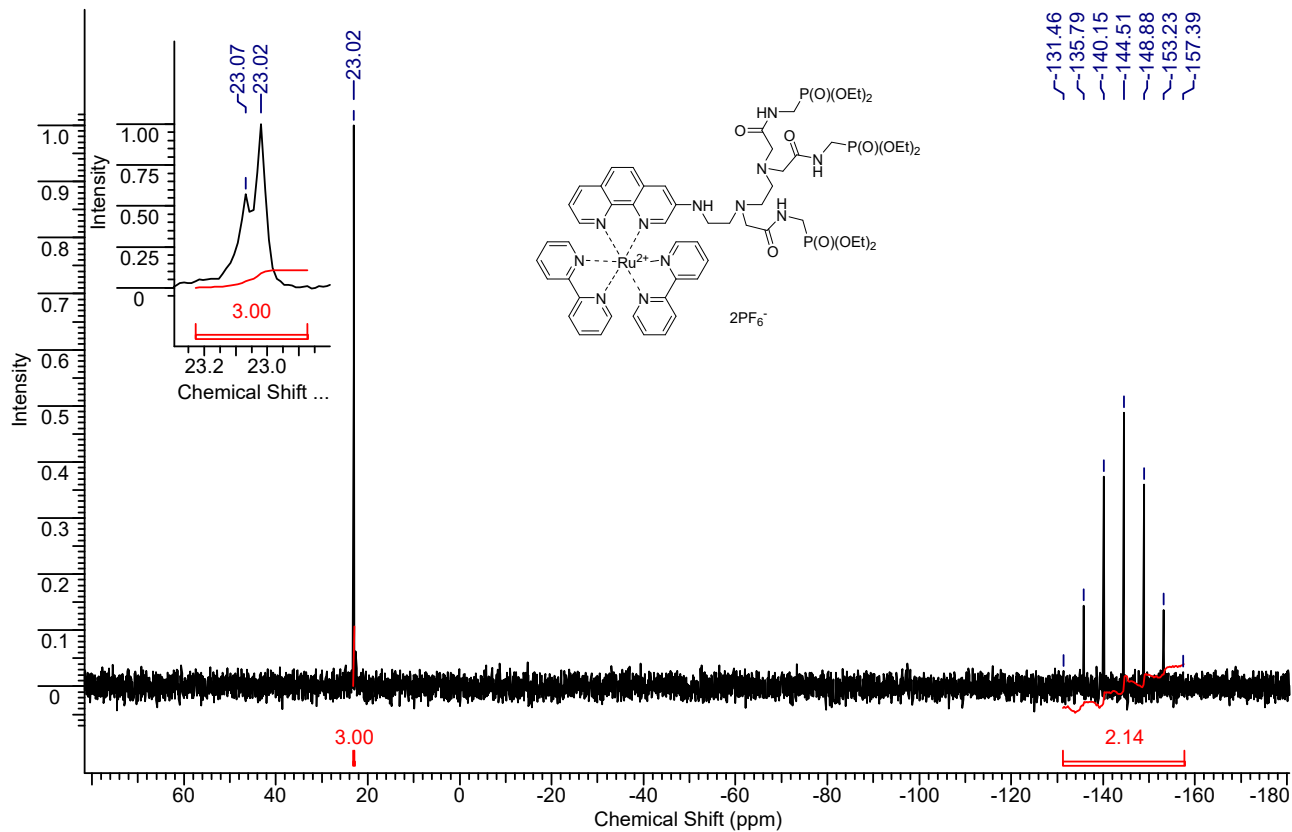

**Figure S27.**  $^{31}\text{P}$  NMR spectrum of  $\text{Ru}(\text{N}_3\text{P}_3\text{phen})$  ( $\text{CD}_3\text{CN}$ , 162.5 MHz, 300 K).

## 9. References

- [1] P. Gans, A. Sabatini, A. Vacca, *Talanta* **1996**, *43*, 1739-1753.
- [2] K. J. Powell, P. L. Brown, R. H. Byrne, T. Gajda, G. Hefter, S. Sjöberg, H. Wanner, *Pure Appl. Chem.* **2007**, *79*, 895-950.
